# Supplementary material
Source: publisher site journal article supplement (https://www.dovepress.com/article/448240)
Supplement: Supplementary file 1 [file get_supplementary_file.php]

**Supplementary Table 1 Characteristics of the Participants (*n*=326)**

| Characteristics | *n* (%) |
| --- | --- |
| Sex |  |
| Male | 179 (54.9) |
| Female | 147 (45.1) |
| Nationality |  |
| Han nationality | 314 (96.3) |
| Minority | 12 (3.7) |
| Marital status |  |
| Married or partnered | 288 (88.3) |
| Never married/Separated/ Divorced/ Widowed | 38 (11.7) |
| Education level |  |
| Elementary school | 63 (19.3) |
| Middle school | 116 (35.6) |
| High school | 51 (15.6) |
| College or above | 96 (29.4) |
| Monthly income (RMB, ¥) |  |
| ≤3000 ¥ | 124 (38.0) |
| ＞3000 ¥ | 202 (62.0) |
| Working status |  |
| Employed | 22 (6.7) |
| Retired/Unemployed | 304 (93.3) |
| Living arrangement |  |
| Alone | 17 (5.2) |
| With spouse | 266 (81.6) |
| With others | 43 (13.2) |
| Caregivers |  |
| Spouse | 248(76.1) |
| Children or others | 61(18.7) |
| Nobody | 17(5.2) |
| Duration of PD (years) |  |
| <4 | 110(33.7) |
| 4-7 | 114(35.0) |
| >7 | 102(31.3) |
| Other chronic disease |  |
| Having | 131 (40.2) |
| Not having | 195 (59.8) |
| Family history of PD |  |
| Having | 17 (5.2) |
| Not having | 309 (94.8) |
| Complications of PD |  |
| Having | 143 (43.9) |
| Not having | 183 (56.1) |
| Subsequent consultation |  |
| Yes | 194 (59.5) |
| No | 132 (40.5) |
| Knowledge about PD |  |
| No understanding | 33 (10.1) |
| Some understanding | 161 (49.4) |
| Good understanding | 132 (40.5) |
| Hoehn & Yahr stage |  |
| 1 | 75 (23.0) |
| 1.5 | 32 (9.8) |
| 2 | 103 (31.6) |
| 2.5 | 65 (19.9) |
| 3 | 45 (13.8) |
| ≥4 | 6 (1.8) |

**Abbreviations:**PD, Parkinson Disease; RMB, Ren Min Bi (the Chinese yuan, ¥)

**Supplementary Table 2** **Multiple Linear Regression Analysis of Influencing Factors on each domain of IPA Among PD Patients**

| Domains of IPA | Factors | *b* | *SE* | *β* | *t* | *p* | 95% CI of *b* | | Adjusted  *R*2 |
| --- | --- | --- | --- | --- | --- | --- | --- | --- | --- |
| Lower | Upper |
| Autonomy  indoors | constant | -0.27 | 1.74 |  | -0.16 | 0.876 | -3.70 | 3.16 | 0.64 |
| Caregivers |  |  |  |  |  |  |  |  |
| Children or others | 1.70 | 0.63 | 0.09 | 2.71 | 0.007 | 0.46 | 2.93 |  |
|  | Nobody | -1.14 | 1.08 | -0.04 | -1.05 | 0.295 | -3.27 | 0.99 |  |
|  | Subsequent consultation | 1.12 | 0.49 | 0.08 | 2.30 | 0.022 | 0.16 | 2.08 |  |
|  | Hoehn & Yahr stage | 1.97 | 0.43 | 0.21 | 4.62 | <0.001 | 1.13 | 2.81 |  |
|  | Strength | -0.21 | 0.04 | -0.22 | -5.87 | <0.001 | -0.28 | -0.14 |  |
|  | Anxiety | 0.07 | 0.03 | 0.09 | 2.34 | 0.020 | 0.01 | 0.12 |  |
|  | UPDRS II | 0.42 | 0.04 | 0.47 | 10.22 | <0.001 | 0.34 | 0.50 |  |
| Family role | constant | 9.84 | 1.79 |  | 5.50 | <0.001 | 6.32 | 13.36 | 0.52 |
|  | Monthly income ＞3000 ¥ | -1.34 | 0.63 | -0.09 | -2.13 | 0.034 | -2.58 | -0.10 |  |
|  | Caregivers |  |  |  |  |  |  |  |  |
|  | Children or others | 0.80 | 0.79 | 0.04 | 1.02 | 0.308 | -0.74 | 2.35 |  |
|  | Nobody | -2.85 | 1.34 | -0.08 | -2.13 | 0.034 | -5.49 | -0.22 |  |
|  | Knowledge about PD |  |  |  |  |  |  |  |  |
|  | Some understanding | 0.31 | 1.03 | 0.02 | 0.30 | 0.761 | -1.72 | 2.35 |  |
|  | Good understanding | 2.44 | 1.08 | 0.06 | 2.26 | 0.025 | 0.31 | 4.56 |  |
|  | Having complications | 2.05 | 0.60 | 0.14 | 3.39 | 0.001 | 0.86 | 3.24 |  |
|  | Hoehn & Yahr stage | 1.63 | 0.53 | 0.16 | 3.07 | 0.002 | 0.59 | 2.68 |  |
|  | Availability of social support | -0.31 | 0.15 | -0.09 | -2.07 | 0.039 | -0.61 | -0.02 |  |
|  | Tenacity | -0.13 | 0.03 | -0.20 | -4.43 | <0.001 | -0.18 | -0.07 |  |
|  | UPDRSI | 0.34 | 0.16 | 0.11 | 2.18 | 0.030 | 0.03 | 0.64 |  |
|  | UPDRSII | 0.28 | 0.06 | 0.30 | 4.93 | <0.001 | 0.17 | 0.40 |  |
| Autonomy  outdoors | constant | 8.11 | 1.11 |  | 7.32 | <0.001 | 5.93 | 10.28 | 0.57 |
| Monthly income ＞3000 ¥ | -1.12 | 0.40 | -0.11 | -2.84 | 0.005 | -1.90 | -0.34 |  |
|  | Knowledge about PD |  |  |  |  |  |  |  |  |
|  | Some understanding | 0.78 | 0.65 | 0.08 | 1.19 | 0.236 | -0.51 | 2.06 |  |
|  | Good understanding | 2.93 | 0.68 | 0.13 | 4.30 | <0.001 | 1.59 | 4.27 |  |
|  | Having complications | 0.94 | 0.38 | 0.09 | 2.47 | 0.014 | 0.19 | 1.70 |  |
|  | Hoehn & Yahr stage | 1.57 | 0.33 | 0.23 | 4.71 | <0.001 | 0.91 | 2.23 |  |  |
|  | Availability of social support | -0.36 | 0.09 | -0.15 | -3.77 | <0.001 | -0.54 | -0.17 |  |
|  | Tenacity | -0.10 | 0.02 | -0.24 | -5.59 | <0.001 | -0.14 | -0.07 |  |
|  | UPDRSI | 0.27 | 0.10 | 0.13 | 2.77 | 0.006 | 0.08 | 0.46 |  |
|  | UPDRS II | 0.12 | 0.04 | 0.20 | 3.43 | 0.001 | 0.05 | 0.20 |  |
| Social relations | constant | 9.65 | 1.65 |  | 5.84 | <0.001 | 6.40 | 12.90 | 0.43 |
| Living arrangement |  |  |  |  |  |  |  |  |
|  | With spouse | 0.94 | 0.88 | 0.08 | 1.06 | 0.290 | -0.80 | 2.68 |  |
|  | With others | 2.07 | 1.01 | 0.15 | 2.05 | 0.041 | 0.09 | 4.05 |  |
|  | Knowledge about PD |  |  |  |  |  |  |  |  |
|  | Some understanding | 0.84 | 0.68 | 0.09 | 1.23 | 0.218 | -0.50 | 2.18 |  |
|  | Good understanding | 1.75 | 0.70 | 0.12 | 2.48 | 0.014 | 0.36 | 3.13 |  |
|  | Availability of social support | -0.46 | 0.10 | -0.21 | -4.67 | <0.001 | -0.65 | -0.27 |  |
|  | Tenacity | -0.14 | 0.02 | -0.35 | -7.03 | <0.001 | -0.18 | -0.10 |  |
|  | UPDRS II | 0.09 | 0.03 | 0.15 | 3.15 | 0.002 | 0.03 | 0.14 |  |
|  | Resignation | 0.26 | 0.08 | 0.18 | 3.40 | 0.001 | 0.11 | 0.41 |  |

**Abbreviations:** IPA, the impact on participation and autonomy; SE, standard error; UPDRS, the Unified Parkinson’s Disease Rating Scale; PD, Parkinson’s disease
